# Supplementary material for: Association between antimicrobial treatment and resistance of pathogenic Escherichia coli isolated from diseased swine in Kagoshima Prefecture, Japan
Source: PubMed Central journal article supplement — J Vet Med Sci. 2021 Jan 12;83(3):358–69. doi: 10.1292/jvms.20-0338 (PMC8025414; doi:10.1292/jvms.20-0338), 2021-01-12
Supplement: jvms-83-358-s001.pdf [file jvms-83-358-s001.pdf]

Supplementary Table 1. Information of *Escherichia coli* isolates used in the present study

| Strain name | O serogroup | Year | Farm | Age of swine <sup>a</sup> | Reported case | Use of antimicrobial for swine <sup>3)</sup> |           |                |               |           |                  |                               |
|-------------|-------------|------|------|---------------------------|---------------|----------------------------------------------|-----------|----------------|---------------|-----------|------------------|-------------------------------|
|             |             |      |      |                           |               | Penicillins                                  | Ceftiofur | Aminoglycoside | Tetracyclines | Phenicols | Fluoroquinolones | Sulfamethoxazole-trimethoprim |
| E2338       | O139        | 1999 | A1   | 70 days                   | Edema disease | ND                                           | ND        | ND             | ND            | ND        | ND               | ND                            |
| E2339       | O55         | 1999 | A1   | 70 days                   | Edema disease | ND                                           | ND        | ND             | ND            | ND        | ND               | ND                            |
| E2340       | O139        | 1999 | B1   | 25 days                   | Edema disease | ND                                           | ND        | ND             | ND            | ND        | ND               | ND                            |
| E2341       | O139        | 1999 | B1   | 40 days                   | Edema disease | ND                                           | ND        | ND             | ND            | ND        | ND               | ND                            |
| E2342       | O8          | 1999 | B1   | 40 days                   | Edema disease | ND                                           | ND        | ND             | ND            | ND        | ND               | ND                            |
| E2344       | O157        | 2000 | A2   | 140 days                  | Edema disease | ND                                           | ND        | ND             | ND            | ND        | ND               | ND                            |
| E2345       | O139        | 2000 | C1   | 30 days                   | Edema disease | Unused                                       | Unused    | Unused         | Used          | Unused    | Unused           | Unused                        |
| E2346       | O139        | 2000 | D1   | 54 days                   | Edema disease | ND                                           | ND        | ND             | ND            | ND        | ND               | ND                            |
| E2348       | O139        | 2000 | D1   | 54 days                   | Edema disease | ND                                           | ND        | ND             | ND            | ND        | ND               | ND                            |
| E2350       | O139        | 2000 | D1   | 54 days                   | Edema disease | ND                                           | ND        | ND             | ND            | ND        | ND               | ND                            |
| E2351       | O121        | 1999 | C2   | ND                        | Others        | ND                                           | ND        | ND             | ND            | ND        | ND               | ND                            |
| E2352       | O139        | 1999 | E1   | ND                        | Others        | ND                                           | ND        | ND             | ND            | ND        | ND               | ND                            |
| E2353       | O139        | 1999 | F1   | ND                        | Others        | ND                                           | ND        | ND             | ND            | ND        | ND               | ND                            |
| E2354       | O139        | 1999 | F1   | ND                        | Others        | ND                                           | ND        | ND             | ND            | ND        | ND               | ND                            |
| E2355       | O139        | 1999 | F1   | ND                        | Others        | ND                                           | ND        | ND             | ND            | ND        | ND               | ND                            |
| E2356       | O139        | 1999 | F1   | ND                        | Others        | ND                                           | ND        | ND             | ND            | ND        | ND               | ND                            |
| E2357       | O139        | 1999 | F1   | ND                        | Others        | ND                                           | ND        | ND             | ND            | ND        | ND               | ND                            |
| E2358       | O139        | 1999 | F1   | ND                        | Others        | ND                                           | ND        | ND             | ND            | ND        | ND               | ND                            |
| E2359       | O2          | 1999 | G1   | 90 days                   | Others        | ND                                           | ND        | ND             | ND            | ND        | ND               | ND                            |
| E2360       | O139        | 2000 | A3   | 50 days                   | Edema disease | Unused                                       | Unused    | Unused         | Unused        | Unused    | Unused           | Unused                        |
| E2361       | O139        | 2000 | A3   | 50 days                   | Edema disease | Unused                                       | Unused    | Unused         | Unused        | Unused    | Unused           | Unused                        |
| E2362       | O139        | 2000 | A3   | 50 days                   | Edema disease | Unused                                       | Unused    | Unused         | Unused        | Unused    | Unused           | Unused                        |
| E2363       | OSB9        | 2000 | D1   | 60 days                   | Diarrhea      | Unused                                       | Unused    | Unused         | Unused        | Unused    | Used             | Used                          |
| E2364       | OSB9        | 2000 | D1   | 35 days                   | Diarrhea      | Unused                                       | Unused    | Unused         | Unused        | Unused    | Used             | Used                          |
| E2365       | OSB9        | 2000 | D1   | ND                        | Diarrhea      | Unused                                       | Unused    | Unused         | Unused        | Unused    | Used             | Used                          |
| E2366       | O149        | 2000 | H1   | 10 days                   | Diarrhea      | Used                                         | Unused    | Used           | Used          | Unused    | Unused           | Unused                        |
| E2367       | O149        | 2000 | H1   | 10 days                   | Diarrhea      | Used                                         | Unused    | Used           | Used          | Unused    | Unused           | Unused                        |
| E2368       | O138        | 2001 | H2   | ND                        | Others        | Used                                         | Unused    | Unused         | Unused        | Unused    | Unused           | Unused                        |
| E2369       | O139        | 2001 | A4   | 50 days                   | Edema disease | Unused                                       | Unused    | Unused         | Unused        | Unused    | Unused           | Unused                        |
| E2370       | O149        | 2001 | A3   | 40 days                   | Diarrhea      | Unused                                       | Unused    | Unused         | Unused        | Unused    | Unused           | Unused                        |
| E2371       | O139        | 2001 | A3   | 40 days                   | Diarrhea      | Unused                                       | Unused    | Unused         | Unused        | Unused    | Unused           | Unused                        |
| E2372       | O149        | 2001 | A3   | 40 days                   | Diarrhea      | Unused                                       | Unused    | Unused         | Unused        | Unused    | Unused           | Unused                        |
| E2373       | OSB9        | 2001 | A5   | 60 days                   | Edema disease | ND                                           | ND        | ND             | ND            | ND        | ND               | ND                            |
| E2374       | OSB9        | 2001 | A5   | 60 days                   | Edema disease | ND                                           | ND        | ND             | ND            | ND        | ND               | ND                            |
| E2375       | OSB9        | 2001 | A5   | 60 days                   | Edema disease | ND                                           | ND        | ND             | ND            | ND        | ND               | ND                            |
| E2376       | O139        | 2001 | I1   | 30 days                   | Edema disease | ND                                           | ND        | ND             | ND            | ND        | ND               | ND                            |
| E2377       | O139        | 2001 | I1   | 30 days                   | Edema disease | ND                                           | ND        | ND             | ND            | ND        | ND               | ND                            |
| E2378       | O139        | 2001 | I1   | 30 days                   | Edema disease | ND                                           | ND        | ND             | ND            | ND        | ND               | ND                            |
| E2379       | O149        | 2001 | I1   | 30 days                   | Diarrhea      | ND                                           | ND        | ND             | ND            | ND        | ND               | ND                            |
| E2380       | O149        | 2001 | I1   | 90 days                   | Diarrhea      | ND                                           | ND        | ND             | ND            | ND        | ND               | ND                            |
| E2381       | O139        | 2001 | I1   | 32 days                   | Edema disease | ND                                           | ND        | ND             | ND            | ND        | ND               | ND                            |
| E2382       | O149        | 2001 | I1   | 12 days                   | Diarrhea      | ND                                           | ND        | ND             | ND            | ND        | ND               | ND                            |
| E2383       | O149        | 2001 | I1   | 12 days                   | Diarrhea      | ND                                           | ND        | ND             | ND            | ND        | ND               | ND                            |
| E2384       | O149        | 2001 | I1   | 12 days                   | Diarrhea      | ND                                           | ND        | ND             | ND            | ND        | ND               | ND                            |
| E2385       | O149        | 2001 | I1   | 12 days                   | Diarrhea      | ND                                           | ND        | ND             | ND            | ND        | ND               | ND                            |
| E2386       | O149        | 2001 | I1   | 12 days                   | Diarrhea      | ND                                           | ND        | ND             | ND            | ND        | ND               | ND                            |
| E2387       | O149        | 2001 | I1   | 12 days                   | Diarrhea      | ND                                           | ND        | ND             | ND            | ND        | ND               | ND                            |



|       |      |      |     |          |               |        |        |        |        |        |        |        |
|-------|------|------|-----|----------|---------------|--------|--------|--------|--------|--------|--------|--------|
| E2445 | OSB9 | 2003 | A7  | 30 days  | Diarrhea      | Unused | Unused | Unused | Unused | Unused | Unused | Used   |
| E2446 | OSB9 | 2003 | A7  | 30 days  | Diarrhea      | Unused | Unused | Unused | Unused | Unused | Unused | Used   |
| E2447 | OSB9 | 2003 | A7  | 20 days  | Diarrhea      | Used   | Unused | Used   | Unused | Unused | Unused | Used   |
| E2448 | OSB9 | 2003 | A7  | 20 days  | Diarrhea      | Used   | Unused | Used   | Unused | Unused | Unused | Used   |
| E2449 | O149 | 2003 | D4  | 14 days  | Diarrhea      | ND     |
| E2450 | O149 | 2003 | D4  | 14 days  | Diarrhea      | ND     |
| E2451 | O139 | 2003 | H4  | 30 days  | Others        | Unused | Unused | Unused | Unused | Unused | Used   | Used   |
| E2452 | O9   | 2003 | H4  | 60 days  | Others        | Unused | Unused | Unused | Unused | Unused | Used   | Used   |
| E2453 | O139 | 2003 | H4  | 60 days  | Others        | Unused | Unused | Unused | Unused | Unused | Used   | Used   |
| E2454 | O139 | 2003 | C9  | 30 days  | Edema disease | Used   | Unused | Unused | Unused | Unused | Unused | Unused |
| E2455 | O139 | 2003 | C9  | 30 days  | Edema disease | Used   | Unused | Unused | Unused | Unused | Unused | Unused |
| E2456 | O139 | 2003 | H4  | 30 days  | Edema disease | Unused | Unused | Unused | Unused | Unused | Used   | Unused |
| E2457 | O139 | 2003 | H4  | 30 days  | Others        | Used   | Unused | Unused | Unused | Unused | Unused | Unused |
| E2458 | OUT  | 2003 | H4  | 30 days  | Others        | Used   | Unused | Unused | Unused | Unused | Unused | Unused |
| E2459 | O121 | 2003 | G2  | 30 days  | Edema disease | Unused |
| E2460 | O121 | 2003 | G2  | 30 days  | Edema disease | Unused |
| E2461 | OSB9 | 2003 | D5  | 30 days  | Edema disease | ND     |
| E2462 | OSB9 | 2003 | D5  | 30 days  | Edema disease | ND     |
| E2463 | OUT  | 2003 | C8  | 32 days  | Diarrhea      | Used   | Unused | Used   | Unused | Unused | Unused | Unused |
| E2464 | OUT  | 2003 | C8  | 32 days  | Diarrhea      | Used   | Unused | Used   | Unused | Unused | Unused | Unused |
| E2465 | OUT  | 2003 | C8  | 32 days  | Diarrhea      | Used   | Unused | Used   | Unused | Unused | Unused | Unused |
| E2466 | O8   | 2003 | D6  | 35 days  | Others        | ND     |
| E2472 | O139 | 2003 | aa1 | 150 days | Others        | ND     |
| E2473 | O139 | 2004 | aa2 | 120 days | Others        | ND     |
| E2474 | O2   | 2004 | M1  | 40 days  | Edema disease | Used   | Unused | Used   | Unused | Unused | Unused | Unused |
| E2475 | O139 | 2004 | aa2 | 50 days  | Diarrhea      | Used   | Unused | Unused | Unused | Unused | Unused | Unused |
| E2476 | O139 | 2004 | aa2 | 60 days  | Diarrhea      | Used   | Unused | Unused | Unused | Unused | Unused | Unused |
| E2477 | OUT  | 2004 | A8  | 60 days  | Diarrhea      | Unused | Unused | Used   | Unused | Unused | Unused | Unused |
| E2478 | OUT  | 2004 | A8  | 60 days  | Diarrhea      | Unused | Unused | Used   | Unused | Unused | Unused | Unused |
| E2479 | O8   | 2004 | A8  | 60 days  | Diarrhea      | Unused | Unused | Used   | Unused | Unused | Unused | Unused |
| E2480 | O139 | 2004 | D7  | 60 days  | Edema disease | Used   | Unused | Unused | Unused | Used   | Unused | Unused |
| E2481 | O139 | 2004 | D7  | 90 days  | Edema disease | Used   | Unused | Unused | Unused | Used   | Unused | Unused |
| E2482 | O139 | 2004 | D7  | 60 days  | Edema disease | Used   | Unused | Unused | Unused | Used   | Unused | Unused |
| E2483 | O77  | 2004 | D8  | 14 days  | Diarrhea      | Used   | Unused | Used   | Used   | Unused | Unused | Unused |
| E2484 | O8   | 2004 | A9  | 30 days  | Diarrhea      | Used   | Unused | Used   | Unused | Unused | Unused | Unused |
| E2485 | O8   | 2004 | A9  | 30 days  | Diarrhea      | Used   | Unused | Used   | Unused | Unused | Unused | Unused |
| E2486 | O139 | 2004 | H4  | 40 days  | Edema disease | Unused |
| E2487 | O139 | 2004 | H4  | 52 days  | Edema disease | Unused |
| E2488 | O139 | 2004 | H4  | 47 days  | Edema disease | Unused |
| E2489 | OSB9 | 2004 | A10 | 30 days  | Diarrhea      | Unused |
| E2490 | OSB9 | 2004 | A10 | 30 days  | Diarrhea      | Unused |
| E2491 | OSB9 | 2004 | A10 | 30 days  | Diarrhea      | Unused |
| E2492 | OSB9 | 2004 | A10 | 30 days  | Diarrhea      | Unused |
| E2493 | O68  | 2004 | D4  | 14 days  | Others        | ND     |
| E2494 | OUT  | 2004 | D4  | 14 days  | Others        | ND     |
| E2495 | OUT  | 2004 | D4  | 14 days  | Others        | ND     |
| E2496 | O139 | 2004 | D9  | 80 days  | Edema disease | Unused | Unused | Unused | Unused | Used   | Unused | Unused |
| E2497 | O139 | 2004 | D9  | 80 days  | Edema disease | Unused | Unused | Unused | Unused | Used   | Unused | Unused |
| E2498 | O139 | 2004 | D9  | 80 days  | Edema disease | Unused | Unused | Unused | Unused | Used   | Unused | Unused |
| E2499 | OUT  | 2005 | D4  | 14 days  | Diarrhea      | ND     |
| E2500 | O162 | 2005 | I2  | 15 days  | Diarrhea      | Used   | Unused | Used   | Unused | Unused | Unused | Unused |





|       |      |      |     |         |               |        |        |        |        |        |        |        |
|-------|------|------|-----|---------|---------------|--------|--------|--------|--------|--------|--------|--------|
| E2609 | OSB9 | 2009 | D17 | 36 days | Diarrhea      | Unused | Unused | Unused | Unused | Unused | Used   | Unused |
| E2610 | OSB9 | 2009 | D17 | 39 days | Diarrhea      | Unused | Unused | Unused | Unused | Unused | Used   | Unused |
| E2611 | OSB9 | 2009 | C17 | 30 days | Diarrhea      | Unused | Unused | Unused | Used   | Unused | Unused | Unused |
| E2612 | OSB9 | 2009 | R3  | 80 days | Diarrhea      | Used   | Unused | Unused | Unused | Unused | Unused | Unused |
| E2613 | O149 | 2010 | C14 | 90 days | Diarrhea      | Unused | Unused | Unused | Unused | Used   | Unused | Unused |
| E2614 | O121 | 2010 | Q2  | 60 days | Others        | ND     |
| E2615 | O116 | 2010 | R3  | 93 days | Diarrhea      | Unused | Unused | Unused | Unused | Unused | Used   | Unused |
| E2616 | O116 | 2010 | R3  | 93 days | Diarrhea      | Unused | Unused | Unused | Unused | Unused | Used   | Unused |
| E2617 | O35  | 2010 | C18 | 30 days | Diarrhea      | Used   | Unused | Unused | Unused | Unused | Unused | Unused |
| E2618 | O89  | 2010 | U1  | 30 days | Septicemia    | Unused |
| E2619 | O34  | 2010 | U1  | 27 days | Septicemia    | Unused |
| E2620 | O116 | 2011 | V1  | 52 days | Others        | ND     |
| E2621 | O116 | 2011 | V1  | 38 days | Others        | ND     |
| E2622 | O139 | 2011 | J1  | 47 days | Edema disease | Unused | Unused | Used   | Unused | Unused | Unused | Unused |
| E2623 | O139 | 2011 | N2  | 55 days | Others        | ND     |
| E2624 | O55  | 2012 | D18 | 38 days | Diarrhea      | ND     |
| E2625 | O86  | 2012 | D18 | 34 days | Diarrhea      | ND     |
| E2626 | O86  | 2012 | D18 | 34 days | Diarrhea      | ND     |
| E2627 | OUT  | 2012 | V2  | 40 days | Diarrhea      | ND     |
| E2628 | OUT  | 2012 | A15 | 60 days | Others        | ND     |
| E2629 | OSB9 | 2012 | A10 | 40 days | Diarrhea      | Unused |
| E2630 | O8   | 2011 | B9  | 40 days | Others        | Unused | Unused | Unused | Used   | Unused | Unused | Unused |
| E2631 | O2   | 2012 | C17 | 10 days | Others        | ND     |
| E2632 | OUT  | 2012 | C17 | 10 days | Others        | ND     |
| E2633 | O91  | 2012 | D7  | 60 days | Others        | Unused | Unused | Unused | Unused | Used   | Unused | Unused |
| E2634 | O86  | 2013 | D18 | 30 days | Edema disease | Unused |
| E2635 | O86  | 2013 | D18 | 30 days | Edema disease | Unused |
| E2636 | O35  | 2013 | C18 | 21 days | Diarrhea      | Unused | Used   | Unused | Unused | Unused | Used   | Unused |
| E2637 | O35  | 2013 | C18 | 21 days | Diarrhea      | Unused | Used   | Unused | Unused | Unused | Used   | Unused |
| E2638 | O35  | 2013 | C18 | 21 days | Diarrhea      | Unused | Used   | Unused | Unused | Unused | Used   | Unused |
| E2639 | O139 | 2013 | V3  | 30 days | Edema disease | Unused |
| E2640 | O139 | 2013 | V3  | 30 days | Edema disease | Unused |
| E2641 | O139 | 2013 | V3  | 30 days | Edema disease | Unused |
| E2642 | O23  | 2013 | D19 | 10 days | Diarrhea      | ND     |
| E2643 | O25  | 2013 | D20 | 70 days | Others        | Unused | Unused | Unused | Unused | Unused | Used   | Unused |
| E2644 | O149 | 2013 | C18 | 35 days | Diarrhea      | Unused | Unused | Unused | Unused | Unused | Used   | Unused |
| E2645 | O9   | 2013 | A16 | 50 days | Diarrhea      | ND     |
| E2646 | O8   | 2013 | D21 | 90 days | Others        | Unused | Used   | Unused | Unused | Unused | Used   | Unused |
| E2647 | O139 | 2013 | V2  | 50 days | Edema disease | Unused |
| E2648 | O78  | 2013 | D22 | ND      | Diarrhea      | ND     |
| E2649 | O7   | 2013 | D22 | ND      | Diarrhea      | ND     |
| E2650 | O8   | 2013 | D23 | ND      | Diarrhea      | ND     |
| E2651 | O8   | 2013 | D23 | ND      | Diarrhea      | ND     |
| E2652 | OUT  | 2013 | D11 | 6 days  | Diarrhea      | ND     |
| E2653 | OUT  | 2013 | D11 | 6 days  | Diarrhea      | ND     |
| E2654 | O98  | 2013 | D19 | 7 days  | Diarrhea      | ND     |
| E2655 | O45  | 2013 | G5  | 50 days | Others        | ND     |
| E2656 | OUT  | 2013 | I3  | 21 days | Others        | ND     |
| E2657 | OUT  | 2013 | D17 | 9 days  | Diarrhea      | ND     |
| E2658 | O116 | 2013 | D24 | ND      | Diarrhea      | ND     |
| E2659 | O116 | 2013 | D24 | ND      | Diarrhea      | ND     |

|       |       |      |     |          |               |        |        |        |        |        |        |        |
|-------|-------|------|-----|----------|---------------|--------|--------|--------|--------|--------|--------|--------|
| E2660 | O20   | 2014 | H1  | 6 days   | Diarrhea      | Used   | Unused | Used   | Unused | Unused | Unused | Unused |
| E2661 | OUT   | 2014 | H10 | 7 days   | Diarrhea      | ND     |
| E2662 | OUT   | 2014 | H11 | 11 days  | Diarrhea      | ND     |
| E2663 | O35   | 2014 | G6  | 33 days  | Others        | ND     |
| E2664 | OUT   | 2014 | D22 | 18 days  | Diarrhea      | ND     |
| E2665 | OUT   | 2014 | U2  | 2 days   | Diarrhea      | ND     |
| E2666 | OUT   | 2014 | U2  | 2 days   | Diarrhea      | ND     |
| E2667 | O76   | 2014 | U2  | 7 days   | Diarrhea      | ND     |
| E2668 | OUT   | 2014 | G7  | 4 days   | Diarrhea      | ND     |
| E2669 | O116  | 2014 | D22 | 40 days  | Others        | ND     |
| E2670 | O8    | 2014 | M4  | ND       | Diarrhea      | ND     |
| E2671 | O142  | 2014 | cc1 | 90 days  | Others        | ND     |
| E2672 | O139  | 2014 | C16 | 40 days  | Edema disease | Unused |
| E2673 | O35   | 2014 | C18 | 40 days  | Edema disease | Unused |
| E2674 | O114  | 2014 | B10 | 80 days  | Others        | ND     |
| E2675 | O10   | 2014 | D25 | 7 days   | Diarrhea      | ND     |
| E2676 | O116  | 2014 | D25 | 30 days  | Diarrhea      | ND     |
| E2678 | OUT   | 2014 | D18 | 1 days   | Others        | ND     |
| E2679 | OUT   | 2014 | D18 | 1 days   | Others        | ND     |
| E2680 | O51   | 2014 | H12 | 90 days  | Edema disease | ND     |
| E2681 | O139  | 2014 | H12 | 90 days  | Edema disease | ND     |
| E2682 | O149  | 2014 | D26 | 20 days  | Diarrhea      | ND     |
| E2683 | O66   | 2014 | N1  | 1 days   | Others        | ND     |
| E2684 | O128  | 2014 | W1  | 5 days   | Diarrhea      | ND     |
| E2685 | O116  | 2015 | D4  | 55 days  | Diarrhea      | Used   | Unused | Unused | Unused | Unused | Unused | Unused |
| E2686 | O8    | 2015 | E4  | 4 days   | Diarrhea      | ND     |
| E2687 | O23   | 2015 | X1  | 10 days  | Diarrhea      | ND     |
| E2688 | O146  | 2015 | A17 | 2 years  | Others        | Used   | Unused | Unused | Unused | Unused | Unused | Unused |
| E2689 | O7    | 2015 | A17 | 1 years  | Others        | Unused | Unused | Unused | Unused | Unused | Used   | Unused |
| E2690 | O118  | 2015 | A17 | 30 days  | Others        | ND     |
| E2691 | O139  | 2015 | C18 | 80 days  | Edema disease | Unused | Unused | Unused | Unused | Unused | Used   | Unused |
| E2692 | O51   | 2015 | C18 | 80 days  | Edema disease | Unused | Unused | Unused | Unused | Unused | Used   | Unused |
| E2693 | O157  | 2015 | A4  | 2 days   | Diarrhea      | ND     |
| E2694 | O8    | 2015 | A4  | 2 days   | Diarrhea      | ND     |
| E2695 | O20   | 2015 | A4  | 2 days   | Diarrhea      | ND     |
| E2696 | O139  | 2015 | C18 | 50 days  | Edema disease | Unused | Unused | Unused | Unused | Unused | Used   | Unused |
| E2697 | O64   | 2015 | I4  | 1 days   | Diarrhea      | ND     |
| E2698 | O64   | 2015 | I4  | 1 days   | Diarrhea      | ND     |
| E2699 | OUT   | 2015 | B11 | 24 days  | Diarrhea      | Used   | Unused | Unused | Used   | Used   | Used   | Unused |
| E2700 | O139  | 2015 | V4  | 39 days  | Edema disease | Used   | Unused | Unused | Unused | Used   | Unused | Unused |
| E2701 | O77   | 2015 | V4  | 39 days  | Edema disease | Used   | Unused | Unused | Unused | Used   | Unused | Unused |
| E2702 | OSB17 | 2015 | B11 | 1 days   | Others        | Unused | Unused | Unused | Used   | Unused | Unused | Unused |
| E2703 | OUT   | 2015 | O2  | 5 days   | Others        | Unused | Unused | Unused | Used   | Unused | Unused | Unused |
| E2704 | O9    | 2015 | Q3  | 120 days | Diarrhea      | Unused | Unused | Unused | Unused | Unused | Used   | Unused |
| E2705 | O116  | 2015 | D27 | 30 days  | Diarrhea      | Used   | Unused | Unused | Unused | Unused | Unused | Unused |
| E2706 | O9    | 2015 | D27 | 30 days  | Diarrhea      | Used   | Unused | Unused | Unused | Unused | Unused | Unused |
| E2707 | O157  | 2015 | B10 | 50 days  | Edema disease | Used   | Used   | Used   | Unused | Unused | Unused | Unused |
| E2708 | O9    | 2015 | E4  | 7 days   | Diarrhea      | ND     |
| E2709 | O132  | 2015 | X2  | 4 days   | Diarrhea      | ND     |
| E2710 | OUT   | 2015 | B12 | 14 days  | Diarrhea      | ND     |
| E2711 | OUT   | 2016 | C19 | 25 days  | Diarrhea      | ND     |

|       |      |      |     |          |                            |        |        |        |        |        |        |        |
|-------|------|------|-----|----------|----------------------------|--------|--------|--------|--------|--------|--------|--------|
| E2712 | O149 | 2016 | B13 | 2 days   | Diarrhea                   | Used   | Unused | Used   | Unused | Unused | Unused | Unused |
| E2713 | O115 | 2016 | B13 | 60 days  | Diarrhea                   | Unused |
| E2714 | O108 | 2016 | V2  | 45 days  | Edema disease and Diarrhea | Used   | Unused | Unused | Unused | Unused | Unused | Unused |
| E2715 | O116 | 2016 | V2  | 45 days  | Edema disease and Diarrhea | Used   | Unused | Unused | Unused | Unused | Unused | Unused |
| E2716 | O108 | 2016 | V2  | 46 days  | Edema disease and Diarrhea | Used   | Unused | Unused | Unused | Unused | Unused | Unused |
| E2717 | O132 | 2016 | M4  | 102 days | Others                     | ND     |
| E2718 | OUT  | 2017 | A14 | 30 days  | Septicemia                 | ND     |

---

a) ND: no data.



Supplementary Table 2. Association between the use of antimicrobials and antimicrobial resistance

| Antimicrobials used | Resistance outcome <sup>a)</sup> | Exposed   |             | Not exposed |                  | Odds ratio <sup>b)</sup> | p-value <sup>b)</sup> |
|---------------------|----------------------------------|-----------|-------------|-------------|------------------|--------------------------|-----------------------|
|                     |                                  | Resistant | Susceptible | Resistant   | Susceptible      |                          |                       |
| Penicillins         | AMP                              | 57        | 19          | 103         | 39               | 1.14 (0.60-2.15)         | 0.6947                |
|                     | PIP                              | 46        | 29          | 88          | 55               | 0.99 (0.56-1.76)         | 0.9748                |
|                     | CFZ                              | 40        | 35          | 59          | 84               | 1.63 (0.93-2.86)         | 0.0890                |
|                     | CXM                              | 2         | 73          | 6           | 137              | 0.63 (0.12-3.18)         | 0.7178 <sup>c)</sup>  |
|                     | CTX                              | 2         | 73          | 10          | 133              | 0.36 (0.08-1.71)         | 0.2262 <sup>c)</sup>  |
|                     | FEP                              | 1         | 74          | 0           | 143              | 5.78 (0.23-143.60)       | 0.3440 <sup>c)</sup>  |
|                     | GEN*                             | 31        | 44          | 37          | 106              | 2.02 (1.12-3.65)         | 0.0193                |
|                     | KAN                              | 30        | 45          | 45          | 98               | 1.45 (0.81-2.60)         | 0.2078                |
|                     | STR                              | 57        | 18          | 106         | 37               | 1.11 (0.58-2.11)         | 0.7616                |
|                     | TET                              | 68        | 7           | 125         | 18               | 1.40 (0.56-3.52)         | 0.4738                |
|                     | CHL                              | 38        | 37          | 85          | 58               | 0.70 (0.40-1.23)         | 0.2146                |
|                     | NAL                              | 47        | 28          | 83          | 60               | 1.21 (0.68-2.15)         | 0.5086                |
|                     | CIP                              | 31        | 44          | 52          | 91               | 1.23 (0.70-2.18)         | 0.4730                |
|                     | LVX                              | 28        | 47          | 48          | 95               | 1.18 (0.66-2.11)         | 0.5795                |
|                     | GAT                              | 27        | 48          | 39          | 104              | 1.50 (0.82-2.73)         | 0.1828                |
| SXT                 | 50                               | 25        | 89          | 54          | 1.21 (0.67-2.18) | 0.5179                   |                       |
| Ceftiofur           | AMP*                             | 11        | 0           | 149         | 58               | 9.00 (0.52-155.21)       | 0.0394 <sup>c)</sup>  |
|                     | PIP                              | 9         | 2           | 125         | 82               | 2.95 (0.62-14.01)        | 0.2102 <sup>c)</sup>  |
|                     | CFZ**                            | 10        | 1           | 89          | 118              | 13.26 (1.67-105.49)      | 0.0030 <sup>c)</sup>  |
|                     | CXM                              | 1         | 10          | 7           | 200              | 2.86 (0.32-25.52)        | 0.3437 <sup>c)</sup>  |
|                     | CTX**                            | 4         | 7           | 8           | 199              | 14.21 (3.45-58.65)       | 0.0014 <sup>c)</sup>  |
|                     | FEP                              | 0         | 11          | 1           | 206              | -                        | -                     |
|                     | GEN                              | 1         | 10          | 67          | 140              | 0.21 (0.03-1.67)         | 0.1791 <sup>c)</sup>  |
|                     | KAN                              | 6         | 5           | 69          | 138              | 2.40 (0.71-8.14)         | 0.1936 <sup>c)</sup>  |
|                     | STR                              | 8         | 3           | 155         | 52               | 0.89 (0.23-3.50)         | 1.0000 <sup>c)</sup>  |
|                     | TET                              | 8         | 3           | 185         | 22               | 0.32 (0.08- 1.28)        | 0.1183 <sup>c)</sup>  |
|                     | CHL*                             | 10        | 1           | 113         | 94               | 8.32 (1.05-66.17)        | 0.0253 <sup>c)</sup>  |
|                     | NAL                              | 5         | 6           | 125         | 82               | 0.55 (0.16-1.85)         | 0.3575 <sup>c)</sup>  |
|                     | CIP                              | 3         | 8           | 80          | 127              | 0.60 (0.15-2.31)         | 0.5388 <sup>c)</sup>  |
|                     | LVX                              | 3         | 8           | 73          | 134              | 0.69 (0.18-2.67)         | 0.7511 <sup>c)</sup>  |
|                     | GAT                              | 3         | 8           | 63          | 144              | 0.86 (0.22-3.34)         | 1.0000 <sup>c)</sup>  |
| SXT                 | 6                                | 5         | 133         | 74          | 0.67 (0.20-2.26) | 0.5325 <sup>c)</sup>     |                       |
| Aminoglycosides     | AMP                              | 24        | 7           | 136         | 51               | 1.29 (0.52-3.17)         | 0.5839                |
|                     | PIP                              | 18        | 13          | 116         | 71               | 0.85 (0.39-1.83)         | 0.6740                |
|                     | CFZ                              | 11        | 20          | 88          | 99               | 0.62 (0.28-1.36)         | 0.2306                |
|                     | CXM                              | 0         | 31          | 8           | 179              | -                        | -                     |
|                     | CTX                              | 0         | 31          | 12          | 175              | -                        | -                     |
|                     | FEP                              | 0         | 31          | 1           | 186              | -                        | -                     |
|                     | GEN                              | 14        | 17          | 54          | 133              | 2.03 (0.93-4.40)         | 0.0699                |
|                     | KAN                              | 14        | 17          | 61          | 126              | 1.70 (0.79-3.68)         | 0.1734                |
|                     | STR*                             | 28        | 3           | 135         | 52               | 3.60 (1.05-12.34)        | 0.0314                |
|                     | TET                              | 30        | 1           | 163         | 24               | 4.42 (0.58-33.90)        | 0.2179 <sup>c)</sup>  |
|                     | CHL                              | 13        | 18          | 110         | 77               | 0.51 (0.23-1.09)         | 0.0790                |
|                     | NAL                              | 18        | 13          | 112         | 75               | 0.93 (0.43-2.00)         | 0.8475                |
|                     | CIP                              | 16        | 15          | 67          | 120              | 1.91 (0.89-4.11)         | 0.0937                |
|                     | LVX                              | 14        | 17          | 62          | 125              | 1.66 (0.77-3.59)         | 0.1939                |
|                     | GAT                              | 14        | 17          | 52          | 135              | 2.14 (0.98-4.65)         | 0.0514                |
| SXT                 | 17                               | 14        | 122         | 65          | 0.65 (0.30-1.40) | 0.2645                   |                       |
| Tetracyclines       | AMP                              | 13        | 4           | 147         | 54               | 1.19 (0.37-3.82)         | 1.0000 <sup>c)</sup>  |
|                     | PIP                              | 12        | 5           | 122         | 79               | 1.55 (0.53-4.58)         | 0.4208                |
|                     | CFZ                              | 10        | 7           | 89          | 112              | 1.80 (0.66-4.91)         | 0.2474                |
|                     | CXM                              | 0         | 17          | 8           | 193              | -                        | -                     |
|                     | CTX                              | 0         | 17          | 12          | 189              | -                        | -                     |
|                     | FEP                              | 0         | 17          | 1           | 200              | -                        | -                     |
|                     | GEN                              | 2         | 15          | 66          | 135              | 0.27 (0.06-1.23)         | 0.0718                |
|                     | KAN*                             | 2         | 15          | 73          | 128              | 0.23 (0.05-1.05)         | 0.0407                |
|                     | STR                              | 14        | 3           | 149         | 52               | 1.63 (0.45-5.89)         | 0.5707 <sup>c)</sup>  |
|                     | TET                              | 16        | 1           | 177         | 24               | 2.17 (0.28-17.10)        | 0.7001 <sup>c)</sup>  |
|                     | CHL                              | 8         | 9           | 115         | 86               | 0.66 (0.25-1.79)         | 0.4176                |
|                     | NAL                              | 7         | 10          | 123         | 78               | 0.44 (0.16-1.21)         | 0.1063                |
|                     | CIP                              | 5         | 12          | 78          | 123              | 0.66 (0.22-1.94)         | 0.4436                |
|                     | LVX                              | 5         | 12          | 71          | 130              | 0.76 (0.26-2.25)         | 0.6235                |
|                     | GAT                              | 5         | 12          | 61          | 140              | 0.96 (0.32-2.83)         | 0.9333                |
| SXT                 | 8                                | 9         | 131         | 70          | 0.47 (0.18-1.29) | 0.1357                   |                       |
| Phenicols           | AMP                              | 11        | 3           | 149         | 55               | 1.35 (0.36-5.03)         | 0.7647 <sup>c)</sup>  |
|                     | PIP                              | 10        | 4           | 124         | 80               | 1.61 (0.49-5.32)         | 0.4285                |
|                     | CFZ*                             | 10        | 4           | 89          | 115              | 3.23 (0.98-10.64)        | 0.0433                |
|                     | CXM                              | 0         | 14          | 8           | 196              | -                        | -                     |
|                     | CTX                              | 0         | 14          | 12          | 192              | -                        | -                     |
|                     | FEP                              | 0         | 14          | 1           | 203              | -                        | -                     |
|                     | GEN                              | 2         | 12          | 66          | 138              | 0.35 (0.08-1.60)         | 0.2346 <sup>c)</sup>  |
|                     | KAN                              | 3         | 11          | 72          | 132              | 0.50 (0.14-1.85)         | 0.3895 <sup>c)</sup>  |
|                     | STR                              | 12        | 2           | 151         | 53               | 2.11 (0.46-9.72)         | 0.5260 <sup>c)</sup>  |
|                     | TET                              | 13        | 1           | 180         | 24               | 1.73 (0.22-13.85)        | 1.0000 <sup>c)</sup>  |
|                     | CHL*                             | 12        | 2           | 111         | 93               | 5.03 (1.10-23.03)        | 0.0223                |
|                     | NAL                              | 6         | 8           | 124         | 80               | 0.48 (0.16-1.45)         | 0.1860                |
|                     | CIP                              | 2         | 12          | 81          | 123              | 0.25 (0.06-1.16)         | 0.0581                |
|                     | LVX                              | 2         | 12          | 74          | 130              | 0.29 (0.06-1.34)         | 0.1457 <sup>c)</sup>  |
|                     | GAT                              | 2         | 12          | 64          | 140              | 0.36 (0.08-1.68)         | 0.2370 <sup>c)</sup>  |
| SXT                 | 10                               | 4         | 129         | 75          | 1.45 (0.44-4.80) | 0.5371                   |                       |
| Fluoroquinolones    | AMP                              | 31        | 6           | 129         | 52               | 2.08 (0.82-5.29)         | 0.1166                |
|                     | PIP                              | 23        | 14          | 111         | 70               | 1.04 (0.50-2.15)         | 0.9244                |
|                     | CFZ                              | 20        | 17          | 79          | 102              | 1.52 (0.75-3.09)         | 0.2467                |
|                     | CXM                              | 1         | 36          | 7           | 174              | 0.69 (0.08-5.79)         | 1.0000 <sup>c)</sup>  |

|                               |        |    |     |     |                  |                    |                      |
|-------------------------------|--------|----|-----|-----|------------------|--------------------|----------------------|
|                               | CTX    | 1  | 36  | 11  | 170              | 0.43 (0.05-3.43)   | 0.6957 <sup>c)</sup> |
|                               | FEP    | 0  | 37  | 1   | 180              | -                  | -                    |
|                               | GEN    | 13 | 24  | 55  | 126              | 1.24 (0.59-2.62)   | 0.5698               |
|                               | KAN    | 17 | 20  | 58  | 123              | 1.80 (0.88-3.70)   | 0.1048               |
|                               | STR    | 30 | 7   | 133 | 48               | 1.55 (0.64-3.75)   | 0.3320               |
|                               | TET    | 30 | 7   | 163 | 18               | 0.47 (0.18-1.23)   | 0.1528 <sup>c)</sup> |
|                               | CHL    | 16 | 21  | 107 | 74               | 0.53 (0.26-1.08)   | 0.0760               |
|                               | NAL    | 25 | 12  | 105 | 76               | 1.51 (0.71-3.19)   | 0.2804               |
|                               | CIP    | 18 | 19  | 65  | 116              | 1.69 (0.83-3.45)   | 0.1460               |
|                               | LVX    | 15 | 22  | 61  | 120              | 1.34 (0.65-2.77)   | 0.4263               |
|                               | GAT    | 14 | 23  | 52  | 129              | 1.51 (0.72-3.16)   | 0.2719               |
|                               | SXT    | 20 | 17  | 119 | 62               | 0.61 (0.30-1.25)   | 0.1777               |
| Sulfamethoxazole-trimethoprim | AMP    | 11 | 4   | 149 | 54               | 0.00 (0.30-3.26)   | 1.0000 <sup>c)</sup> |
|                               | PIP    | 8  | 7   | 126 | 77               | 0.70 (0.24-2.00)   | 0.5023               |
|                               | CFZ    | 6  | 9   | 93  | 110              | 0.79 (0.27-2.30)   | 0.6629               |
|                               | CXM    | 1  | 14  | 7   | 196              | 2.00 (0.23-17.42)  | 0.4401 <sup>c)</sup> |
|                               | CTX    | 0  | 15  | 12  | 191              | -                  | -                    |
|                               | FEP    | 0  | 15  | 1   | 202              | -                  | -                    |
|                               | GEN*** | 12 | 3   | 56  | 147              | 10.50 (2.86-38.61) | 0.0001 <sup>c)</sup> |
|                               | KAN    | 5  | 10  | 70  | 133              | 0.95 (0.31-2.89)   | 0.9287               |
|                               | STR    | 14 | 1   | 149 | 54               | 5.07 (0.65-39.51)  | 0.1229 <sup>c)</sup> |
|                               | TET    | 13 | 2   | 180 | 23               | 0.83 (0.18-3.92)   | 0.6843 <sup>c)</sup> |
|                               | CHL    | 7  | 8   | 116 | 87               | 0.66 (0.23-1.88)   | 0.4299               |
|                               | NAL*   | 13 | 2   | 117 | 86               | 4.78 (1.05-21.73)  | 0.0270               |
|                               | CIP    | 9  | 6   | 74  | 129              | 2.61 (0.90-7.64)   | 0.0699               |
|                               | LVX    | 6  | 9   | 70  | 133              | 1.27 (0.43-3.70)   | 0.6654               |
|                               | GAT    | 6  | 9   | 60  | 143              | 1.59 (0.54-4.66)   | 0.3946 <sup>c)</sup> |
| SXT                           | 11     | 4  | 128 | 75  | 1.61 (0.50-5.24) | 0.4241             |                      |

a) \*:  $p < 0.05$ , \*\*:  $p < 0.01$ , \*\*\*:  $p < 0.001$ .

b) -: No resistant isolate exposed with antimicrobial agent.

c) The  $p$ -value is based on Fisher's exact test.
